# Supplementary material
Source: PubMed Central journal article supplement (PMC4432738)
Supplement: IAI.02978-14_zii999091261so3.pdf [file IAI.02978-14_zii999091261so3.pdf]

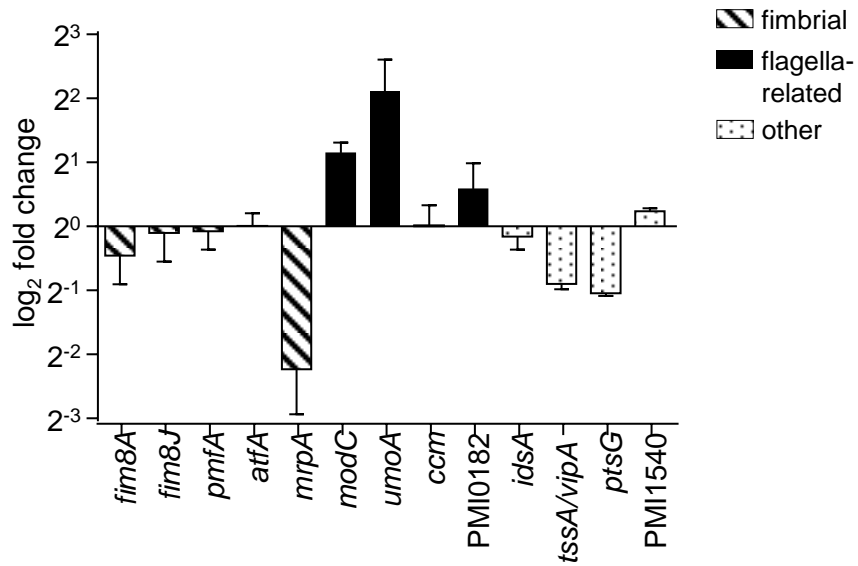

**Figure S1. Expression of selected genes by HI4320Δ*mrpJ*.** Transcription of *mrpJ*-regulated genes was measured by qRT-PCR for the *mrpJ* mutant and compared to the isogenic parent strain. Expression was normalized to *rpoA*. Error bars indicate SEM; results are from three independent experiments.
