# Supplementary material
Source: PubMed Central journal article supplement (PMC4432738)
Supplement: IAI.02978-14_zii999091261so4.pdf [file IAI.02978-14_zii999091261so4.pdf]

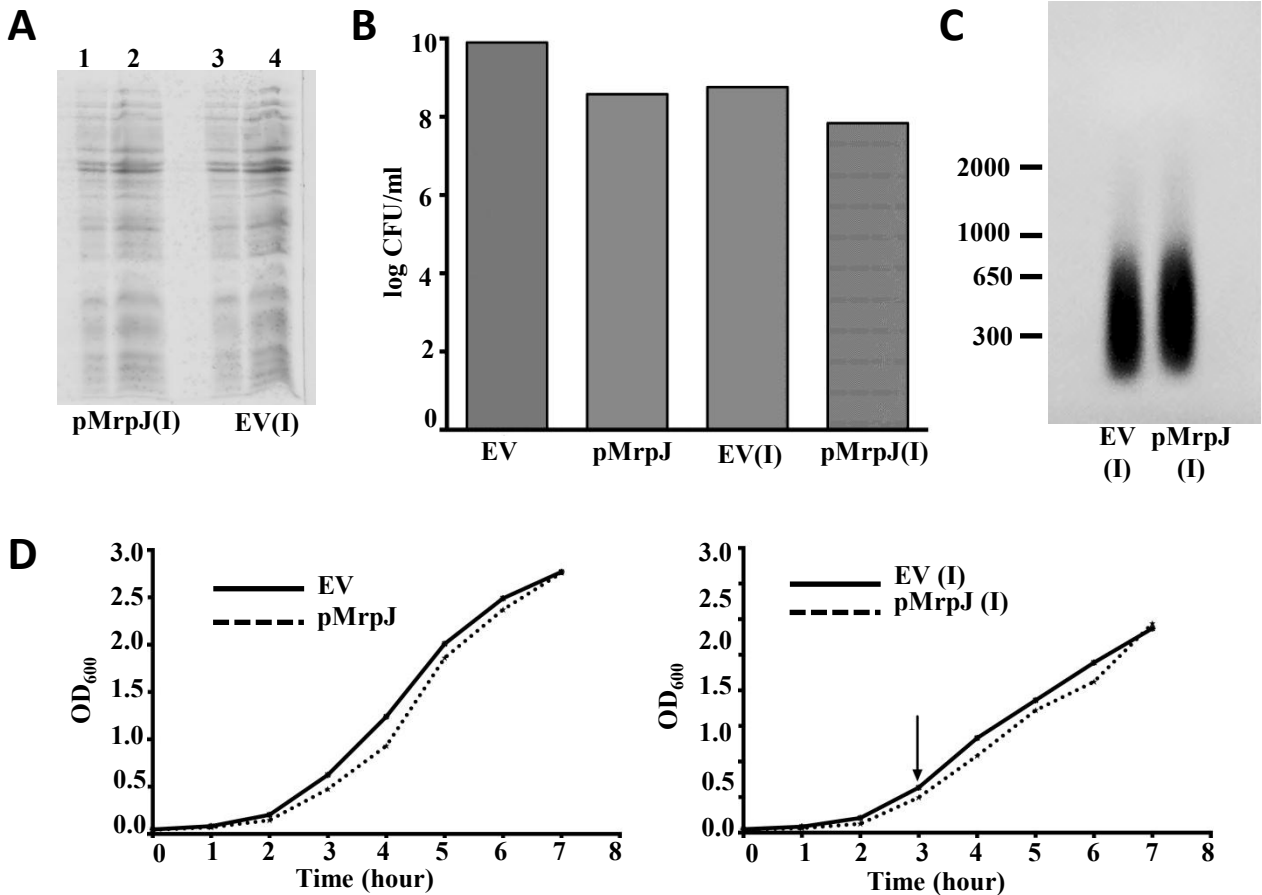

**Figure S2. Establishment of *mrpJ* induction system for CHIP-PCR.** A: Coomassie-stained SDS-PAGE gel of arabiniose-induced *P. mirabilis* lysates with *mrpJ* overexpression plasmid pMP190 (pMrpJ) or empty vector (EV); this is a duplicate gel of Fig. 4A. B: CFU titer of empty vector (EV) and pMrpJ, with or without 0.002% arabinose induction. C: Post-sonication fragment size profile of 0.5  $\mu$ g input DNA (formaldehyde cross-linked and reversed by heat treatment) for CHIP-PCR experiments; size markers (bp) are indicated on the left. D: Growth curve analysis of uninduced or induced pMP190 and EV. The arrow indicates addition of arabinose. Data represent two (A, B, and D) or three (C) experiments with similar results.
